# Supplementary material for: Quantitative Consequences of Protein Carriers in Immunopeptidomics and Tyrosine Phosphorylation MS2 Analyses
Source: PubMed Central journal article supplement (PMC8240026; doi:10.1016/j.mcpro.2021.100104), 2021-05-28
Supplement: mmc1.pdf [file mmc1.pdf]

**Quantitative consequences of protein carriers in immunopeptidomics and tyrosine phosphorylation MS<sup>2</sup> analyses**

Lauren E. Stopfer, Jason E. Conage-Pough & Forest M. White.

Supplemental Data

Supplemental Figures 1-6

Supplementary Tables 1-5 captions

## SUPPLEMENTAL FIGURES

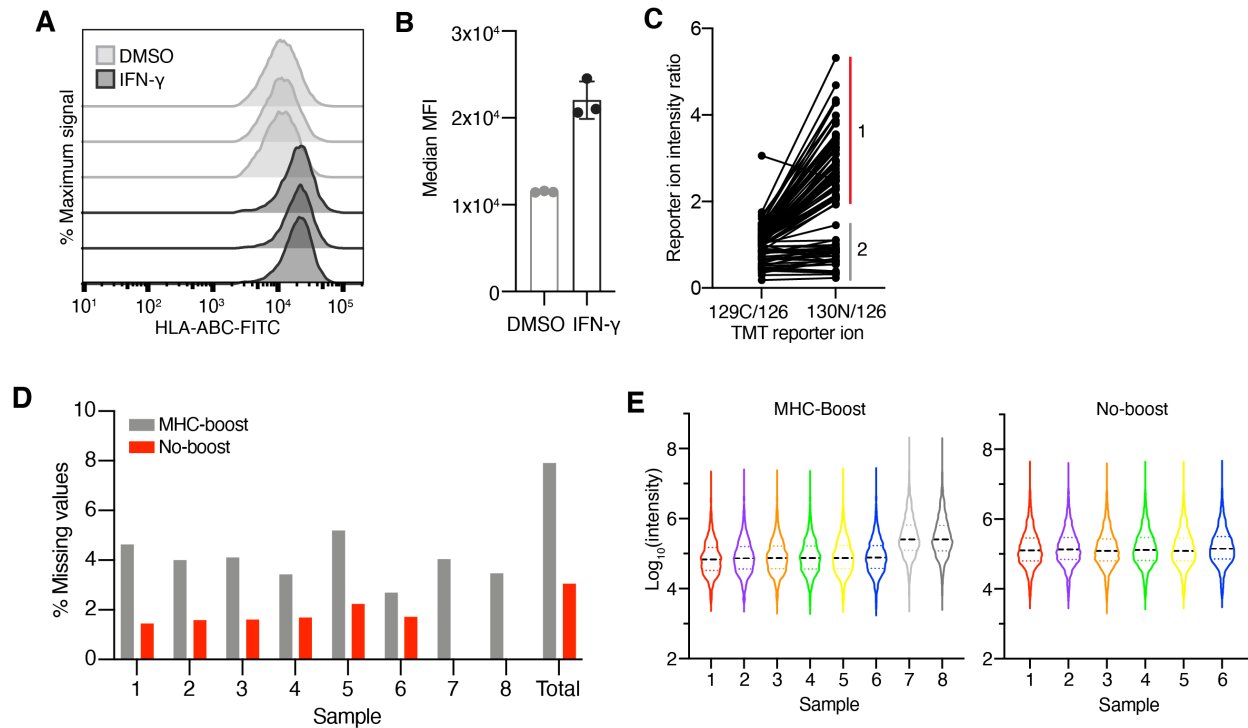

### Supplemental Fig. S1.

**A**, Flow cytometry analysis of surface HLA expression in SKMEL5 cells after 72h of DMSO or IFN-g treatment. Data are presented as % of maximum fluorescence intensity signal. N=3 biological replicates per treatment condition.

**B**, Median MFI of flow cytometry measurements in B. Error bars represent standard deviation from n=3 biological replicates.

**C**, TMT reporter ion intensity ratios between TMT129C and TMT130N versus TMT126 in MHC-boost for peptides with >30% coefficients of variation. Peptides in cluster 1 (red) show altered quantitation in TMT130N only, whereas peptides in cluster 2 (grey) have comparable quantitation.

**D**, Percentage of total PSMs with missing values in each sample.

**E**, Violin plots of reporter ion intensities for pMHC-boost (left) and no-boost (right) analyses. Median: black dashed line, quartiles: colored dotted line.

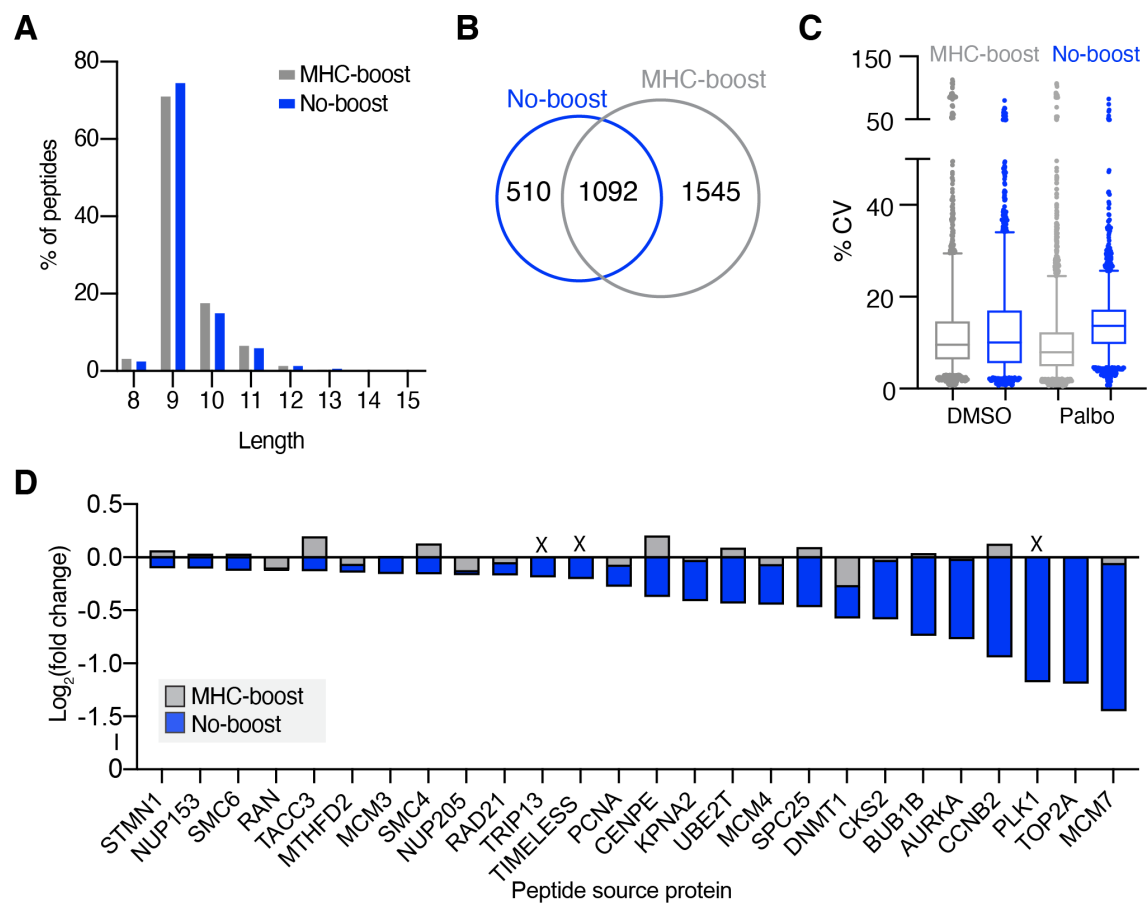

**Supplemental Fig. S2.**

A, Experimental setup of isobaric labels, cell number, and treatment conditions.

B, Length distribution of pMHCs.

C, Venn diagram of unique pMHC identified in the no-boost (blue) and pMHC-boost (grey) analysis.

D, Coefficients of variation of pMHC-boost and no-boost analyses. Boxes outline the interquartile range, and whiskers the 5 and 95th percentiles. pMHC-boost median CV: DMSO= 9.27%, palbociclib: 7.56%, no-boost DMSO = 9.72%, palbociclib = 13.39%.

E, Change in expression for E2F target pMHCs, plotted by source protein, with palbociclib treatment for the no-boost analysis and corresponding expression levels for the pMHC-boost analysis. X denotes pMHCs which were not quantified in the pMHC-boost analysis.

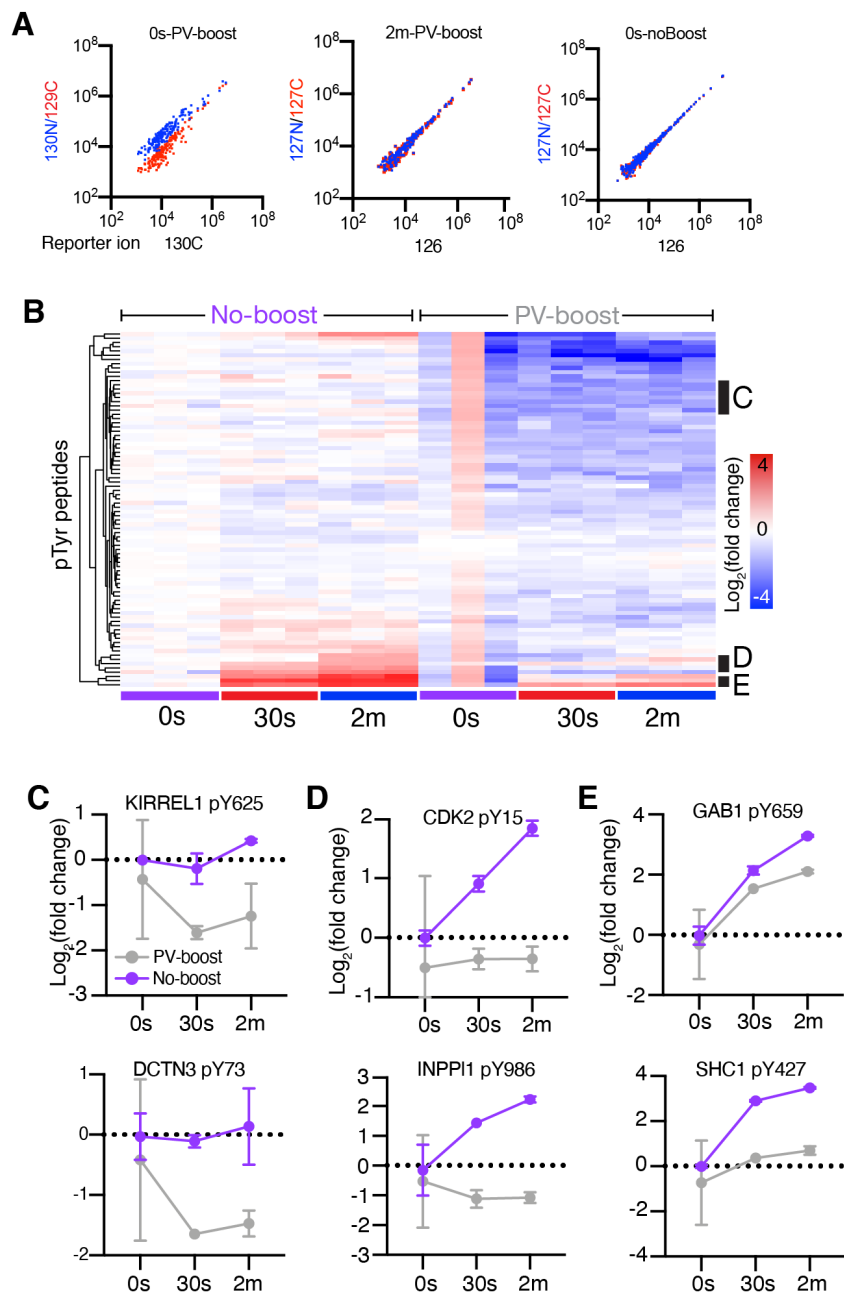

### Supplemental Fig. S3.

**A**, Correlation plots of reporter ion intensities in between 0-s samples in the PV-boost analysis (left, impacted by TMT isotope interference), 2-m PV-boost samples (middle, not impacted by isotopic interference), and 0-s in the no boost analysis as a control (right). Correlation coefficients are  $\geq 0.95$  for all conditions.

**B**, Hierarchical clustering (Euclidean) of  $\text{Log}_2(\text{fold change})$  values of pTyr sites identified in both the PV-boost and no-boost analyses. Values are normalized to the mean 0s intensity.

**C-E**, Selected peptides from corresponding clusters highlighted in **A** represented as  $\text{Log}_2(\text{fold change})$  values over mean 0s intensities. Error bars represent  $\pm$  standard deviation.

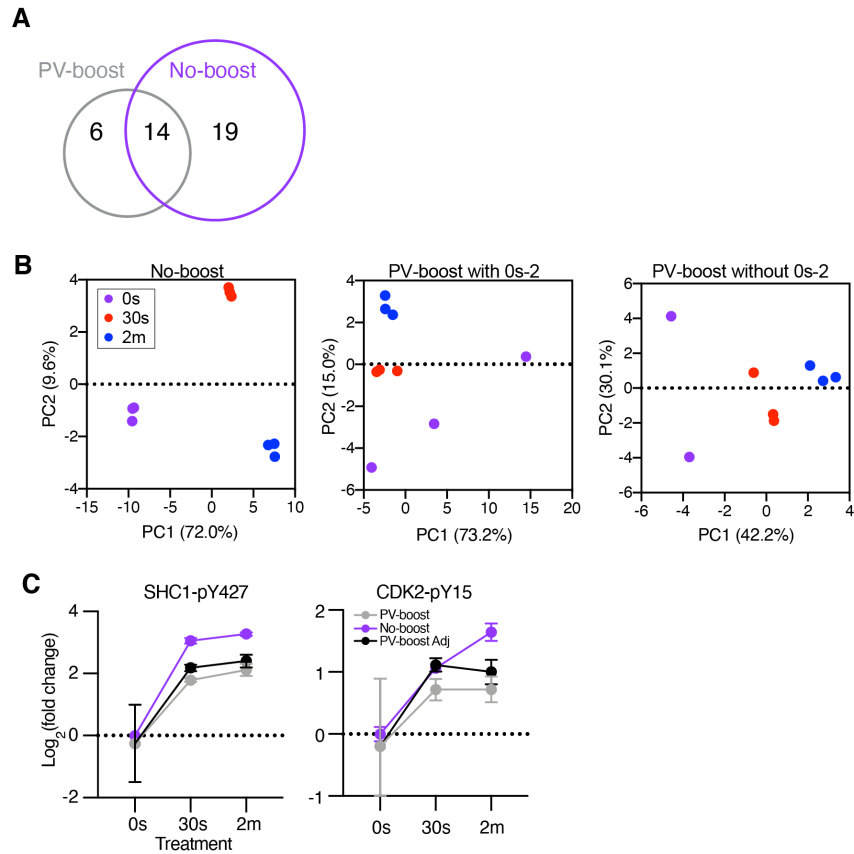

**Supplemental Fig. S4.**

**A**, Venn diagram of the number of unique pTyr peptides significantly different (two-tailed T test,  $p < 0.05$ ) between the 30s and 2m condition.

**B**, Samples plotted by principal component 1 (PC1) and PC2 score for no-boost and PV boost analysis including/excluding the 0s-2 sample and colored by EGF stimulation condition. Percentages define the variance described by the plotted PC.

**C**, Selected peptides represented as  $\text{Log}_2(\text{fold change})$  values over mean 0s intensities for PV-boost (grey), no-boost (purple), and PV-boost peptides normalized to phosphopeptides with unchanging pTyr signal (average  $\text{Log}_2(\text{fold change})$  between -0.1 and 0.1 in 30s and 2m conditions) in the no-boost analysis (PV-boost Adj, black). Error bars represent  $\pm$  standard deviation.

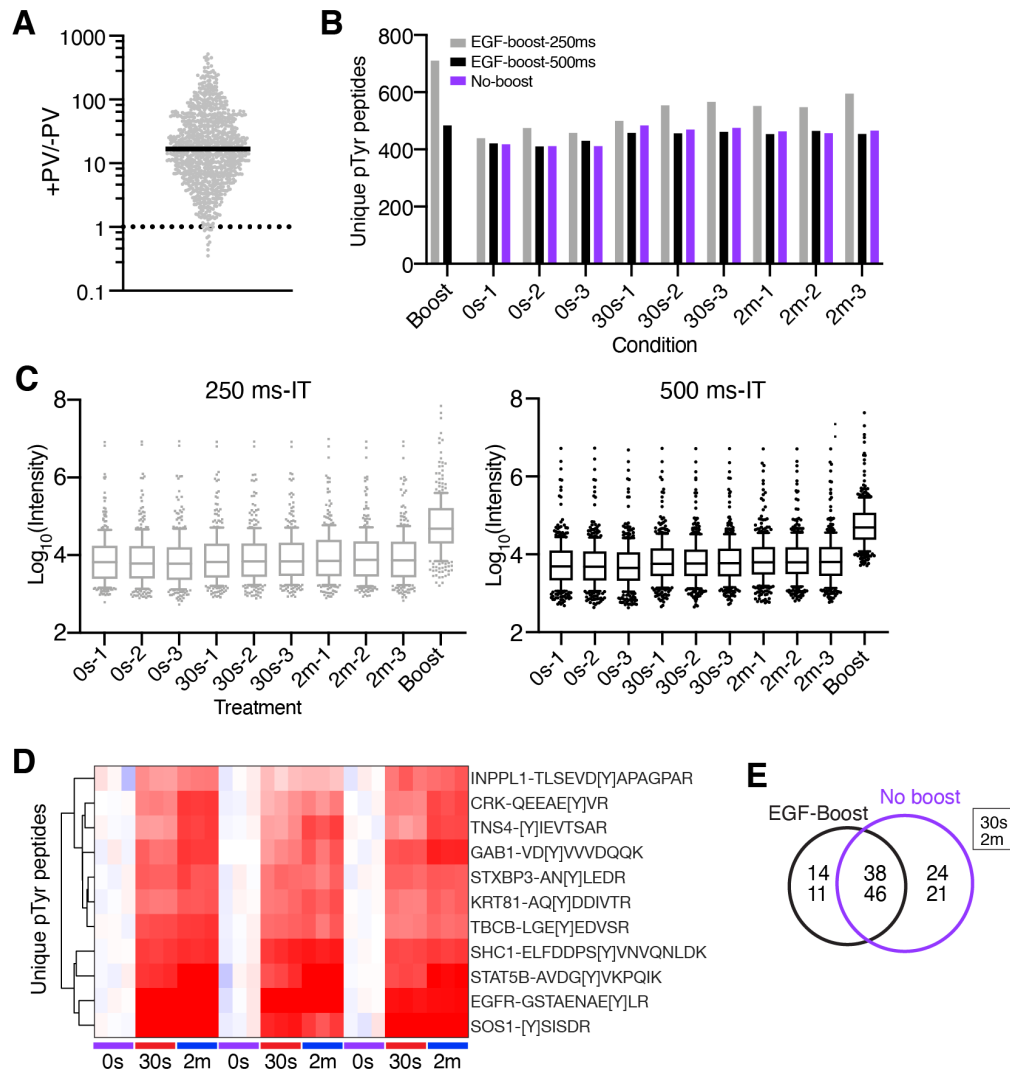

### Supplemental Fig. S5.

**A**, Reporter ion intensity ratios of the median signal of n=3 1 mg Jurkat cell replicates without stimulation and n=2 1 mg Jurkat replicates with PV stimulation, as reported by Chua et al., *MCP*, 2020.

**B**, Number of unique pTyr peptides quantified for each condition for each analysis.

**C**, Reporter ion intensities for EGF-boost 250 ms IT and 500 ms IT analyses. Boxes outline the interquartile range, and whiskers the 10 and 90th percentiles.

**D**, Hierarchical clustering of peptides highlighted by black bar in Figure 5A.

**E**, Venn diagram of number of pTyr peptides significantly different (two-tailed t-test,  $p < 0.05$ ) between the 0s and 30s (upper)/2m (lower) conditions using the EGF-boost 500ms and no-boost data.

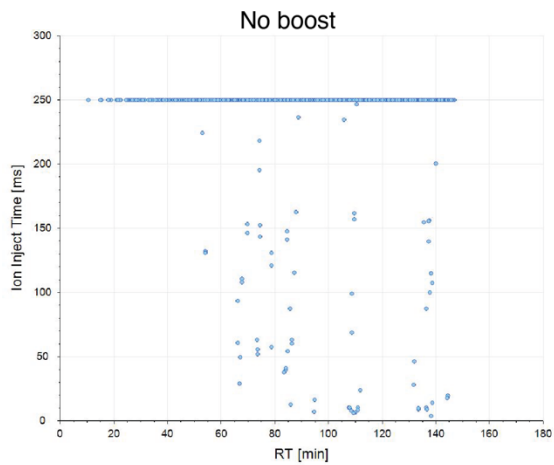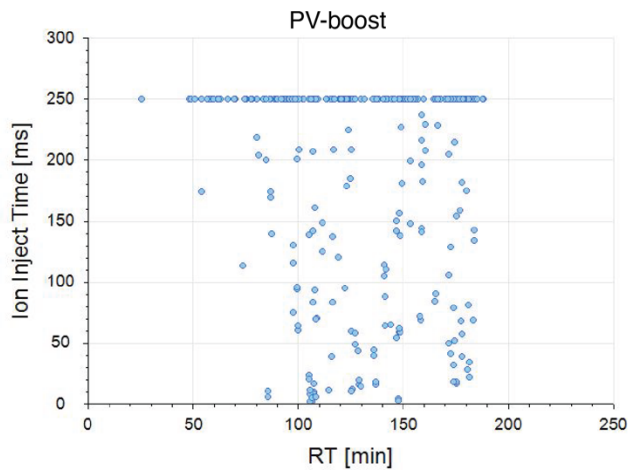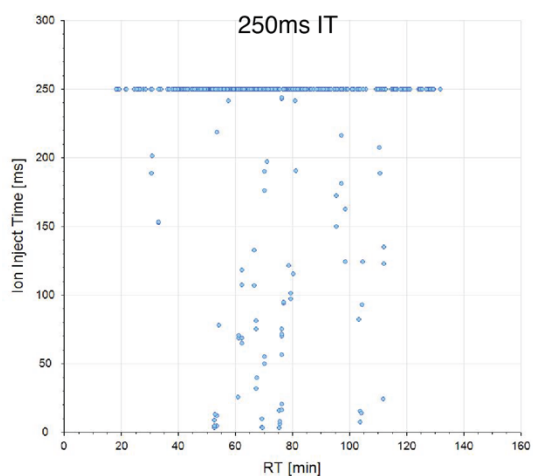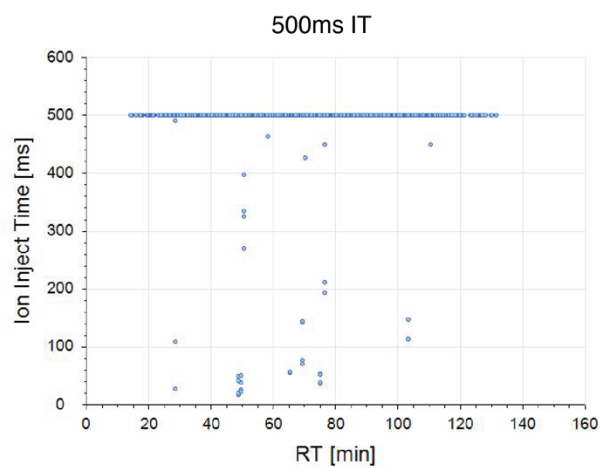

**Supplemental Fig. S6.**

Injection times for filtered PSMs (blue circles) across analyses. Maximum IT is 250 ms for all analyses, except for the 500 ms IT analysis.

## **SUPPLEMENTAL TABLES**

**Supplemental Table S1.** Analyzed MS datasets for MHC analyses described in Figures 1-2.

**Supplemental Table S2.** Filtered search results (PSMs and peptides) for pTyr analyses described in Figures 3-5.

**Supplemental Table S3.** Source data for the hipMHC quantification in Figure 1G.

**Supplemental Table S4.** Matrix of values used for the heatmap in Figure 3G.

**Supplemental Table S5.** Matrix of values used for the heatmap in Figure 5A.
